# Supplementary material for: Comparison between In Vitro Chemical and Ex Vivo Biological Assays to Evaluate Antioxidant Capacity of Botanical Extracts
Source: MDPI journal article supplement (doi:10.3390/antiox10071136), 2021-07-17
Supplement: s1 [file s1]

## SUPPLEMENTARY DATA

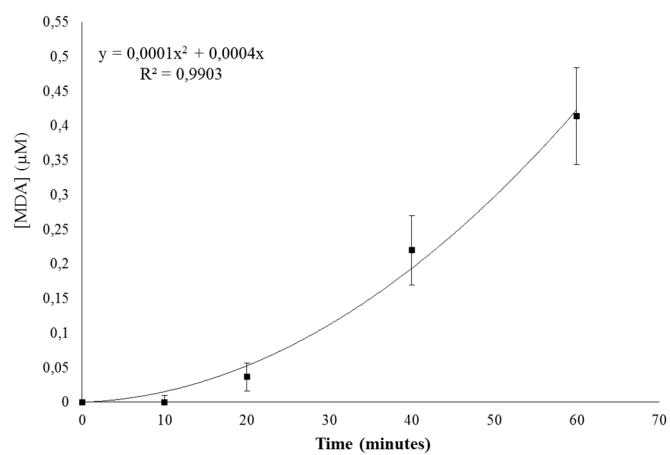

**Figure S1.** Time dependent RBC membranes' lipid peroxidation. Lipid peroxidation was determined through the TBARS assay. MDA(TBA)<sub>2</sub> adduct concentration (μM) is reported.
